# Supplementary material
Source: PubMed Central journal article supplement (PMC5680058)
Supplement: IMM-152-660-s001.pdf [file IMM-152-660-s001.pdf]

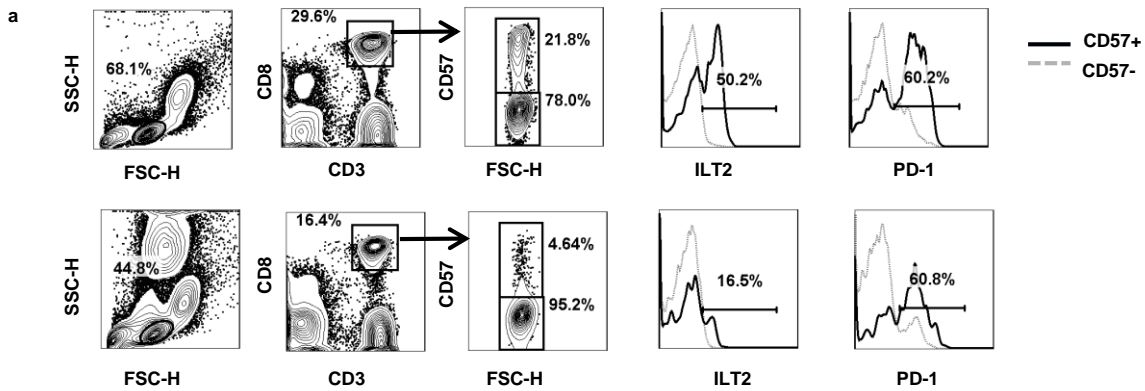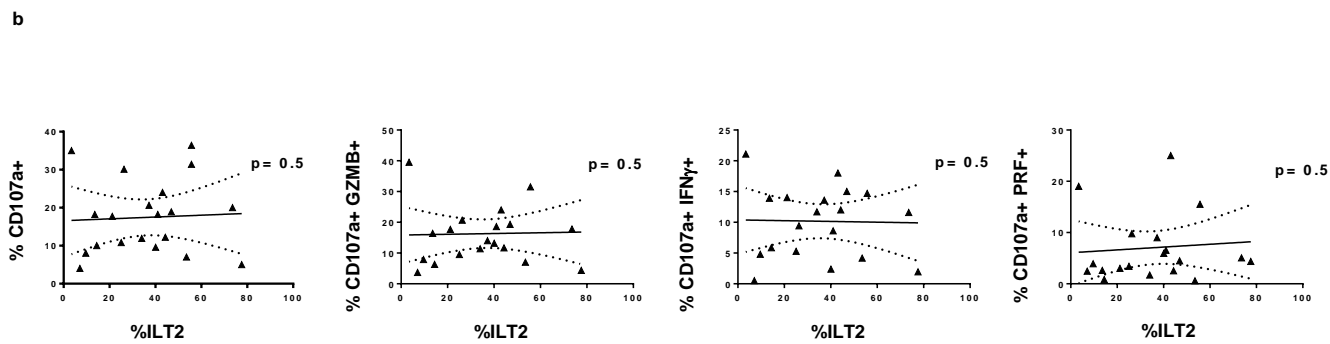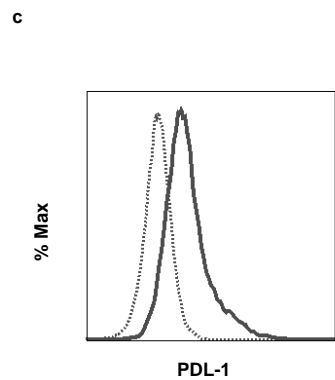

| MS case | Sex/age died | Age at onset | Age at progression | Age at wheelchair | Mean % of CD3+CD57+ cells / perivascular WM infiltrate (a) | SD          | Mean % of CD3+CD57+ cells / meningeal infiltrate (b) | SD          |
|---------|--------------|--------------|--------------------|-------------------|------------------------------------------------------------|-------------|------------------------------------------------------|-------------|
| MS124   | f/30         | 25           | 26                 | 26                | 9,6                                                        | 2,701851217 | 13,6                                                 | 1,816590212 |
| MS286   | m/45         | 29           | 34                 | 34                | 12                                                         | 1,224744871 | 13,6                                                 | 1,140175425 |
| MS293   | f/53         | 35           | 42                 | 43                | 9                                                          | 2,828427125 | 9,4                                                  | 0,894427191 |
| MS312   | f/68         | 45           | 47                 | 53                | 6,6                                                        | 1,816590212 | 8                                                    | 1           |
| MS325   | m/51         | 48           | 48                 | 49                | 12,2                                                       | 1,483239697 | 9                                                    | 1           |
| MS330   | f/59         | 19           | 35                 | 38                | 8,2                                                        | 1,095445115 | 8,2                                                  | 0,836660027 |
| MS342   | f/35         | 29           | 33                 | 34                | 12,6                                                       | 2,073644135 | 15,4                                                 | 1,816590212 |
| MS356   | f/45         | 28           | 41                 |                   | 11,8                                                       | 2,167948339 | 13,2                                                 | 0,836660027 |
| MS402   | m/46         | 25           | 37                 | 38                | 12                                                         | 0,707106781 | 12,8                                                 | 1,303840481 |
| MS407   | f/44         | 25           | 33                 | 34                | 14                                                         | 1,870828693 | 15                                                   | 1           |

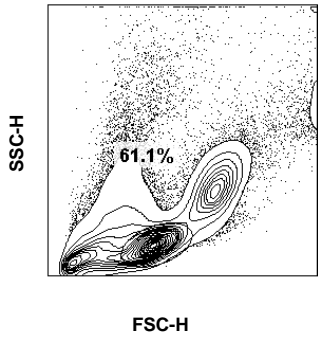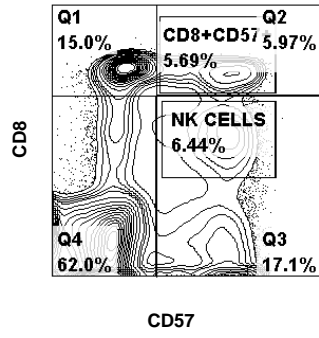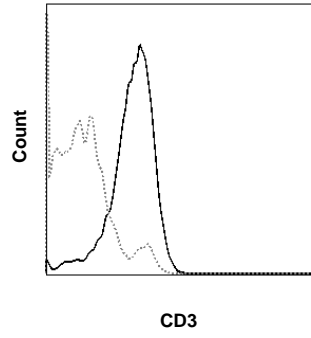

..... NK Cells  
———— CD8+CD57+T cells
